# Supplementary material for: Membrane technologies in toilet urine treatment for toilet urine resource utilization: a review
Source: Royal Society of Chemistry journal article supplement (doi:10.1039/d1ra05816a), 2021-01-01
Supplement: d1ra05816a1.pdf [file d1ra05816a1.pdf]

**TEXT S1. Specific literatures in Fig. 2.**

2016

1. Tian, X., et al., Reverse osmosis brine for phosphorus recovery from source separated urine. *Chemosphere*, 2016. 165: p. 202-210.
2. Tun, L.L., et al., Dewatering of source-separated human urine for nitrogen recovery by membrane distillation. *Journal of Membrane Science*, 2016. 512: p. 13-20.
3. Liu, Q., et al., Integrated forward osmosis-membrane distillation process for human urine treatment. *Water Research*, 2016. 91: p. 45-54.

2017

1. Benedicte, et al., Estimation of Water Flux and Solute Movement during the Concentration Process of Hydrolysed Urine by Forward Osmosis. *Journal of Water and Environment Technology*, 2017. 15(5): p. 163-173.
2. Yao, S., et al., On-site nutrient recovery and removal from source-separated urine by phosphorus precipitation and short-cut nitrification-denitrification. *Chemosphere*, 2017. 175: p. 210-218.
3. Wang, Y.K., et al., In situ utilization of generated electricity for nutrient recovery in urine treatment using a selective electro dialysis membrane bioreactor. *Chemical Engineering Science*, 2017. 171: p. 451-458.

2018

1. Volpin, F., et al., Simultaneous phosphorous and nitrogen recovery from source-separated urine: A novel application for fertiliser drawn forward

osmosis. *Chemosphere*, 2018. 203: p. 482-489.

2. Khumalo, N., et al., Water recovery from hydrolysed human urine samples via direct contact membrane distillation using PVDF/PTFE membrane. *Separation & Purification Technology*, 2018. 211: p. 610-617.
3. Tarpeh, W.A., et al., Electrochemical Stripping to Recover Nitrogen from Source-Separated Urine. *Environmental science & technology*, 2018. 52(3): p. 1453-1460.
4. Volpin, F., et al., Optimisation of a forward osmosis and membrane distillation hybrid system for the treatment of source-separated urine. *Separation & Purification Technology*, 2018. 212: p. 368-375.
5. Jolien, D.P., et al., Refinery and concentration of nutrients from urine with electrodialysis enabled by upstream precipitation and nitrification. *Water Research*, 2018. 144.

2019

1. Volpin, F., et al., Techno-economic feasibility of recovering phosphorus, nitrogen and water from dilute human urine via forward osmosis. *Water Research*, 2019. 150: p. 47-55.
2. Volpin, F., et al., Human urine as a forward osmosis draw solution for the application of microalgae dewatering. *Journal of Hazardous Materials*, 2019. 378.
3. Xu, K., et al., Water Reduction and Nutrient Reconcentration of Hydrolyzed Urine via Direct-Contact Membrane Distillation: Ammonia

Loss and Its Control. *Journal of Environmental Engineering*, 2019. 145(3).

4. Ray, H., F. Perreault, and T.H. Boyer, Urea recovery from fresh human urine by forward osmosis and membrane distillation (FO–MD). *Environmental Science: Water Research & Technology*, 2019. 5(11): p. 1993-2003.

5. Davey, C.J., et al., Hybrid membrane distillation reverse electro dialysis configuration for water and energy recovery from human urine: An opportunity for off-grid decentralised sanitation. *Journal of Membrane Science*, 2019. 584: p. 343-352.

2020

1. Ray, H., F. Perreault, and T.H. Boyer, Ammonia Recovery from Hydrolyzed Human Urine by Forward Osmosis with Acidified Draw Solution. *Environmental science & technology*, 2020. 54(18): p. 11556-11565.

2. Engelhardt, S., et al., Assessment of urea hydrolysis as a pretreatment strategy to improve total nitrogen rejection from urine using aquaporin-based membranes in forward osmosis. *Journal of Water Process Engineering*, 2020. 34.

3. Engelhardt, S., et al., Urine volume reduction during long-duration cave exploration by a light-weight and portable forward osmosis system. *International Journal of Speleology*, 2020. 49(3): p. 229-234.

4. Fva, F., et al., Energy recovery through reverse electro dialysis:

Harnessing the salinity gradient from the flushing of human urine. *Water Research*, 2020. 186.

5. Ray, H., F. Perreault, and T.H. Boyer, Rejection of nitrogen species in real fresh and hydrolyzed human urine by reverse osmosis and nanofiltration. *Journal of Environmental Chemical Engineering*, 2020. 8(4): p. 103993.

6. Refla, B., et al., A five-stage treatment train for water recovery from urine and shower water for long-term human Space missions. *Desalination*, 2020. 495(495).

7. Ray, H., F. Perreault, and T.H. Boyer, Rejection of nitrogen species in real fresh and hydrolyzed human urine by reverse osmosis and nanofiltration. *Journal of Environmental Chemical Engineering*, 2020. 8(4): p. 103993.

8. Volpin, F., et al., Sanitation and dewatering of human urine via membrane bioreactor and membrane distillation and its reuse for fertigation. *Journal of Cleaner Production*, 2020. 270: p. 122390.

9. McCartney, S.N., et al., Novel Isothermal Membrane Distillation with Acidic Collector for Selective and Energy-Efficient Recovery of Ammonia from Urine. *ACS Sustainable Chemistry & Engineering*, 2020. 8(19): p. 7324-7334.
